# Supplementary material for: Effects of amphiphilic block copolymers on the equilibrium lactone fractions of camptothecin analogues at different pHs
Source: Royal Society of Chemistry journal article supplement (doi:10.1039/c3bm60152h), 2013-01-01
Supplement: c3bm60152h.pdf [file c3bm60152h.pdf]

## SUPPORTING INFORMATION

### **Effects of amphiphilic block copolymers on the equilibrium lactone fractions of camptothecin analogues at different pHs**

Tianyuan Ci<sup>1</sup>, Liang Chen<sup>1</sup>, Ting Li<sup>1</sup>, Guangtao Chang<sup>1</sup>, Lin Yu<sup>1,2</sup>, Jiandong Ding<sup>1,2\*</sup>

<sup>1</sup> *State Key Laboratory of Molecular Engineering of Polymers, Department of Macromolecular Science, Advanced Materials Laboratory, Fudan University, Shanghai 200433, China*

<sup>2</sup> *Key Laboratory of Smart Drug Delivery of Ministry of Education, School of Pharmacy, Fudan University, Shanghai 201203, China*

---

\* Corresponding author. Tel: 0086-21-65643506; Fax: 0086-21-65640293; E-mail address: jdding1@fudan.edu.cn  
(J. D. Ding)

## 1. Phase diagram of F127 PBS solutions

The phase diagram was determined by the vial-inverting method. Briefly, 0.8 mL sample solutions were added into the tube in water bath. The equilibrium temperature was started at 10 °C with the increasing rate 1 °C per 15 min. The gel state was defined as no flow of the sample within 30 s.

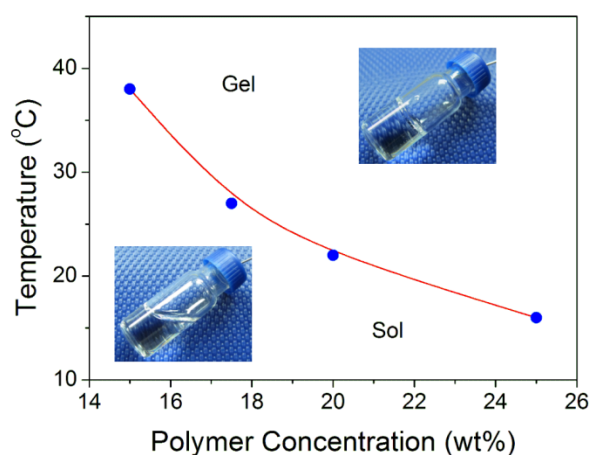

Fig. S1 Phase diagram of the F127/PBS system determined by the vial-inverting method.

## 2. Deduction of $\text{pH}_{\text{opt}}$

For Henderson-Hasselbalch (HH) equation

$$f(\text{pH}) = f_{\infty} + \frac{f_{-\infty} - f_{\infty}}{1 + 10^{n(\text{pH} - \text{pH}_{1/2})}}$$

we just discussed the simplest case with  $n = 1$  and  $f_{-\infty} - f_{\infty} = 1$ . After denoting  $x = \text{pH}$ ,

$a = \text{pH}_{1/2, \text{PBS}}$  and  $b = \text{pH}_{1/2, \text{polymer}}$ , we obtained

$$y = \Delta f_{\text{lactone}} = f_2(x) - f_1(x) = \frac{1}{1 + 10^{(x-b)}} - \frac{1}{1 + 10^{(x-a)}}$$

So,

$$\frac{dy}{dx} = f_2'(x) - f_1'(x) = \frac{-(\ln 10)10^{(x-b)}}{[1 + 10^{(x-b)}]^2} - \frac{-(\ln 10)10^{(x-a)}}{[1 + 10^{(x-a)}]^2}$$

This equation was reduced as

$$y' / \ln 10 = \frac{1}{\frac{1}{10^{(x-a)}} + 2 + 10^{(x-a)}} - \frac{1}{\frac{1}{10^{(x-b)}} + 2 + 10^{(x-b)}}$$

In the case of the optimal pH,  $y' = 0$ . Considering  $a \neq b$ , so

$$\frac{1}{10^{(x-a)}} = 10^{(x-b)}$$

Resolving this equation led to

$$x = \frac{1}{2}(a + b)$$

That is equation (5) in the main manuscript

$$\text{pH}_{\text{opt}} = \frac{1}{2}(\text{pH}_{1/2,\text{PBS}} + \text{pH}_{1/2,\text{polymer}})$$
